# Supplementary material
Source: PubMed Central journal article supplement (PMC3608750)
Supplement: NIHMS437705-supplement-1.pdf [file NIHMS437705-supplement-1.pdf]

Figure S1

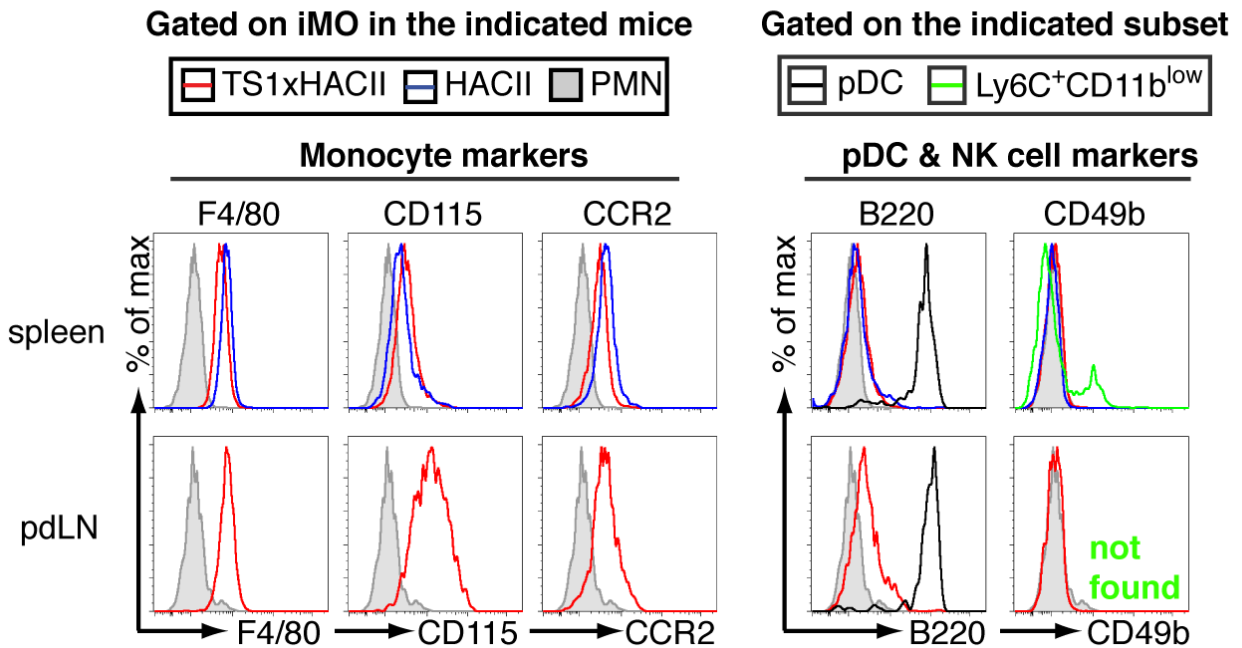

**Figure S1.** iMO from TS1xHACII mice express characteristic cell surface molecules. Histograms show the expression of the indicated markers by iMO from TS1xHACII mice. Plasmacytoid DC and CD11b<sup>low</sup>Ly6C<sup>+</sup> cells (which include NK cells) are shown on the B220 and CD49b histograms as positive controls. Data are representative of 5 independent determinations.
